# Supplementary material for: Development and characterization of an Sf-1-Flp mouse model
Source: JCI journal article supplement (doi:10.1172/jci.insight.190105), 2025-03-04
Supplement: sd1 [file 1]

SFigure 1

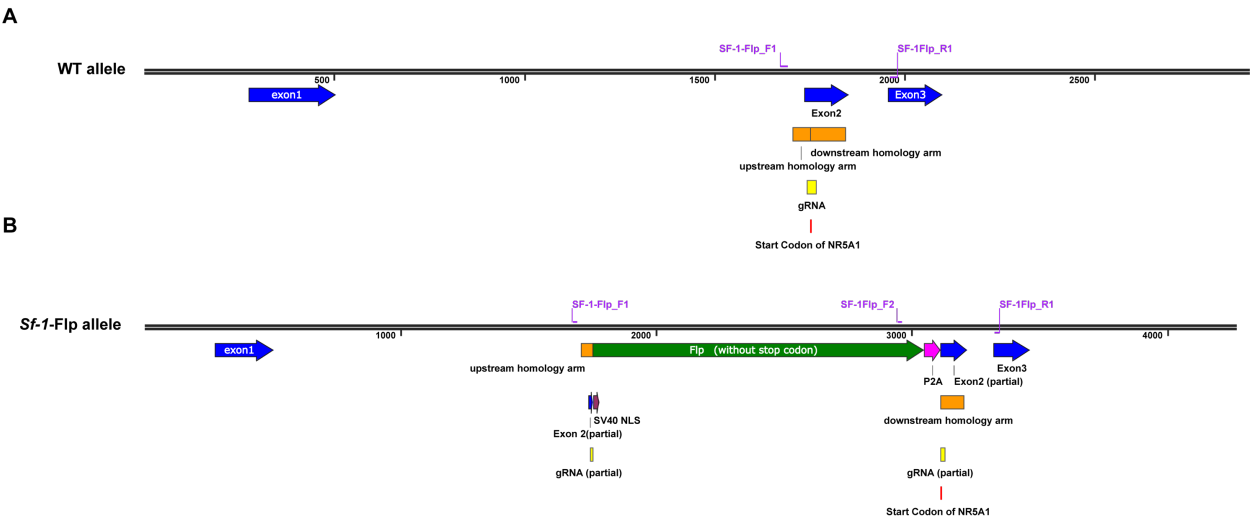

**Supplemental Figure 1. The schematic design of *Sf-1-Flp* mice.** WT allele (upper) and *Sf-1-Flp* allele (lower) sequences are described. SF-1-Flp\_F1, F2, and R3 indicate the location of genotype primers for *Sf-1-Flp* mice.

**SFigure 2**

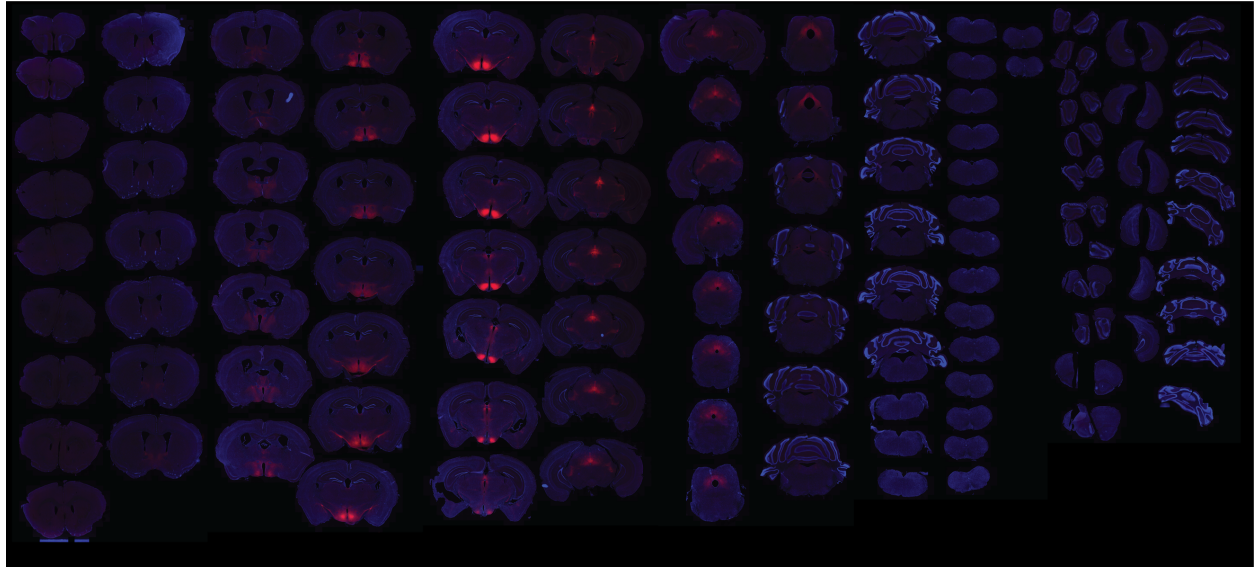

**Supplemental Figure 2. Brains sections of *Sf-1-Flp::Ai65f<sup>TB/-</sup>* mice.** Blue color indicates DAPI staining and red color indicates SF-1 positive cells.

SFigure 3

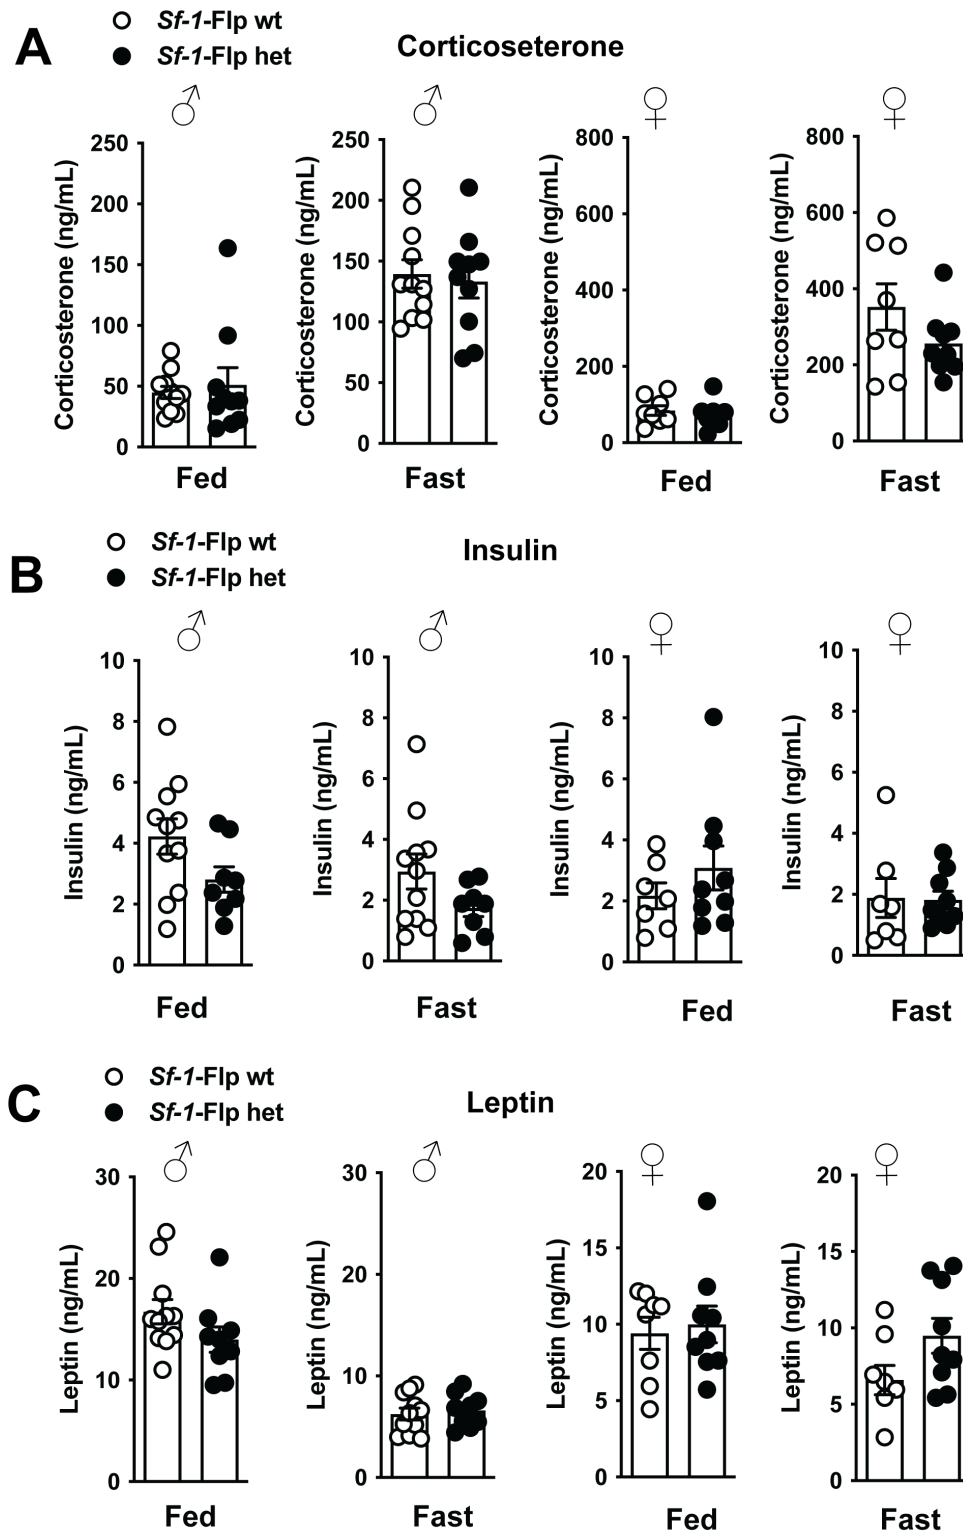

**Supplemental Figure 3. *Sf-1*-Flp mice have normal responses of corticosterone, leptin, and insulin to fasting challenge.** Blood (A) corticosterone, (B) insulin, (C) and leptin levels in fed and 24-hour fast conditions in *Sf-1*-Flp heterozygous male and female mice. Values are mean  $\pm$  S.E.M. Two-tailed unpaired t test was used. N = 7-11.

**SFigure 4**

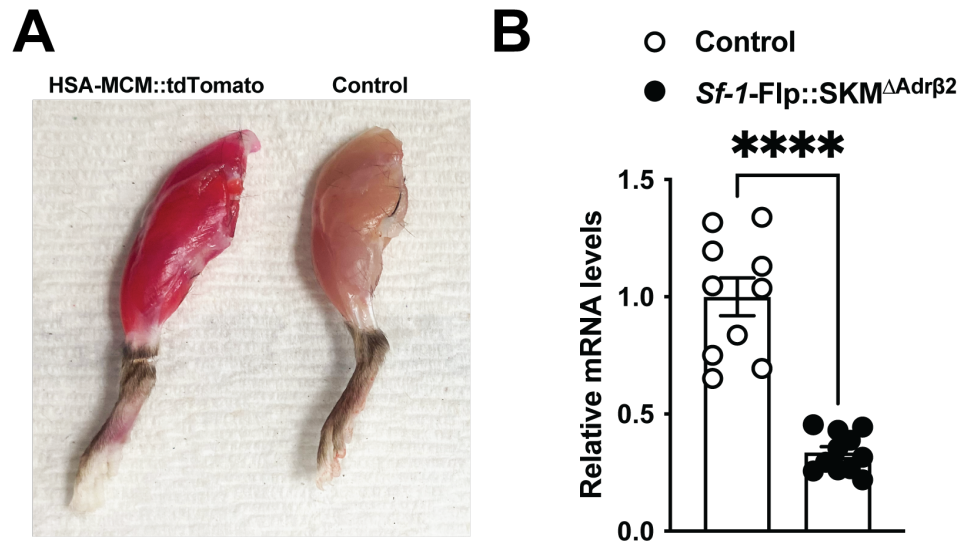

**Supplemental Figure 4. *Sf-1-Flp::SKM $\Delta$ Adrb2* mice has lower *Adrb2* mRNA expression in skeletal muscle.** (A) Representative figure of lower limbs of HSA-MCM::Ai14<sup>TB/-</sup> mice after 4 weeks tamoxifen (TAM) diet. A control group is composed of Ai14 mice. All mice were fed with 4 weeks TAM diet. (B) mRNA levels of *Adrb2* in TA skeletal muscle in *Sf-1-Flp::SKM $\Delta$ Adrb2* mice after 4 weeks tamoxifen diet. A control group is composed of *Sf-1-Flp<sup>+/-</sup>::Adrb2<sup>flox/flox</sup>* mice. All mice were fed with 4 weeks TAM diet. Values are mean  $\pm$  S.E.M. \*\*\*\*  $p < 0.0001$ . Two-tailed unpaired t test was used. N = 8-
